# Supplementary material
Source: PubMed Central journal article supplement (PMC4459862)
Supplement: NIHMS4661-supplement-Supplementary_Figure_1.pdf [file NIHMS4661-supplement-Supplementary_Figure_1.pdf]

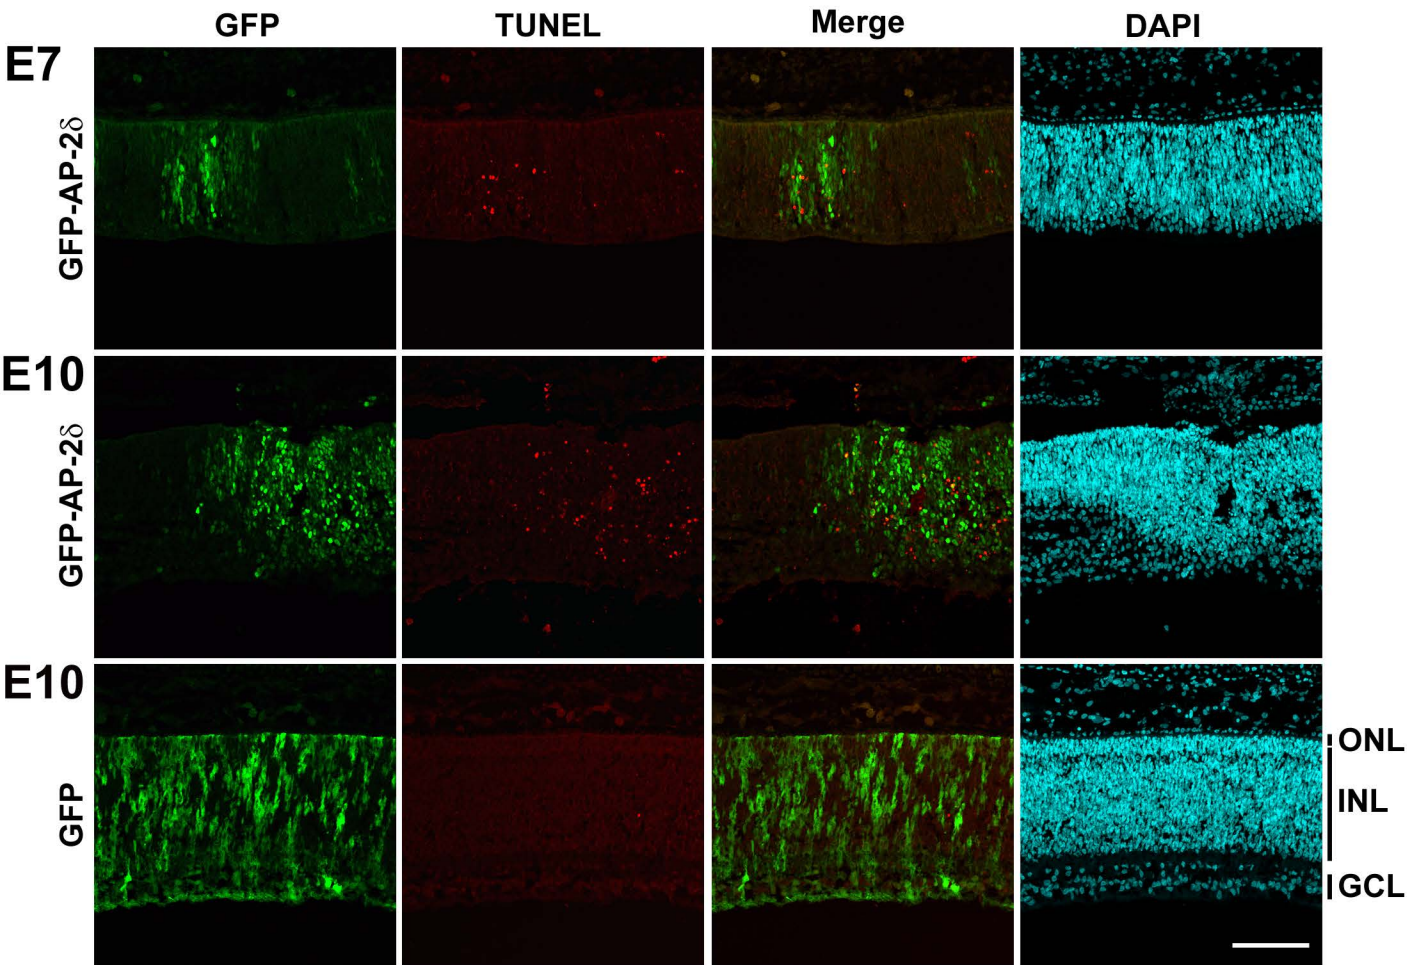

**Figure S1. Apoptosis in AP-2 $\delta$  overexpressing cells.** Retinal tissue sections from E7 and E10 embryos *in ovo* electroporated with GFP or GFP-AP-2 $\delta$  RCAS expression constructs were stained with the TUNEL reagent and apoptotic cells identified using TMR red-dUTP. GFP was detected by epifluorescence. Sections were counterstained with DAPI to label the nuclei. Photographs were taken with a Zeiss LSM710 confocal microscope equipped with a 40X lens. Scale bar = 50  $\mu$ m.
