# Supplementary material
Source: PubMed Central journal article supplement (PMC4459862)
Supplement: NIHMS4661-supplement-supplementary_Figure_2.pdf [file NIHMS4661-supplement-supplementary_Figure_2.pdf]

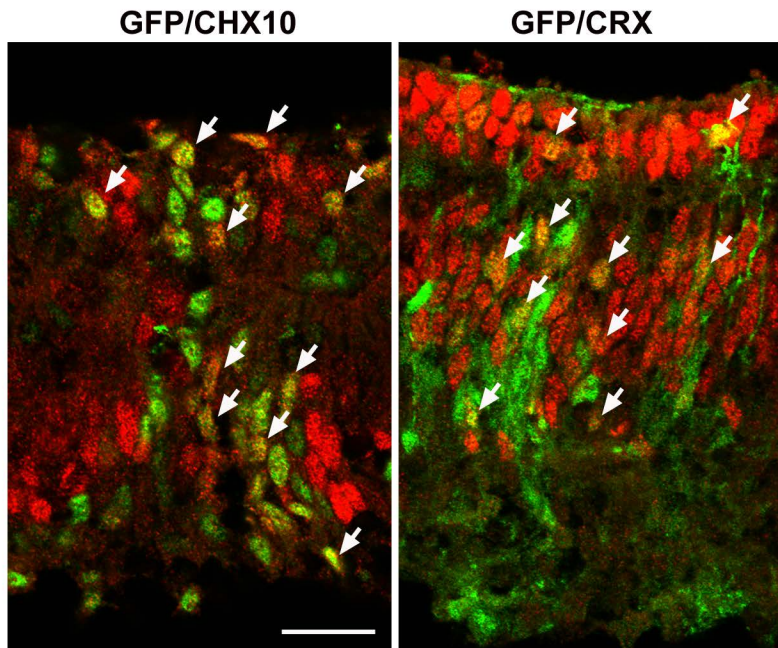

**Figure S2.** Co-expression of lineage-specific markers and AP-2 $\delta$  in E10 embryos. Retinal tissue expressing GFP-AP-2 $\delta$  was double-stained with anti-GFP and anti-CHX10 or anti-CRX antibodies, followed by secondary antibodies linked to Alexa 488 or 555. Arrows indicate co-labeled cells. Photographs were taken with a Zeiss LSM710 confocal microscope equipped with a 40X lens. Scale bar = 20  $\mu$ m.
