# Supplementary material
Source: PubMed Central journal article supplement (PMC4459862)
Supplement: NIHMS4661-supplement-Supplementary_Figure_4.pdf [file NIHMS4661-supplement-Supplementary_Figure_4.pdf]

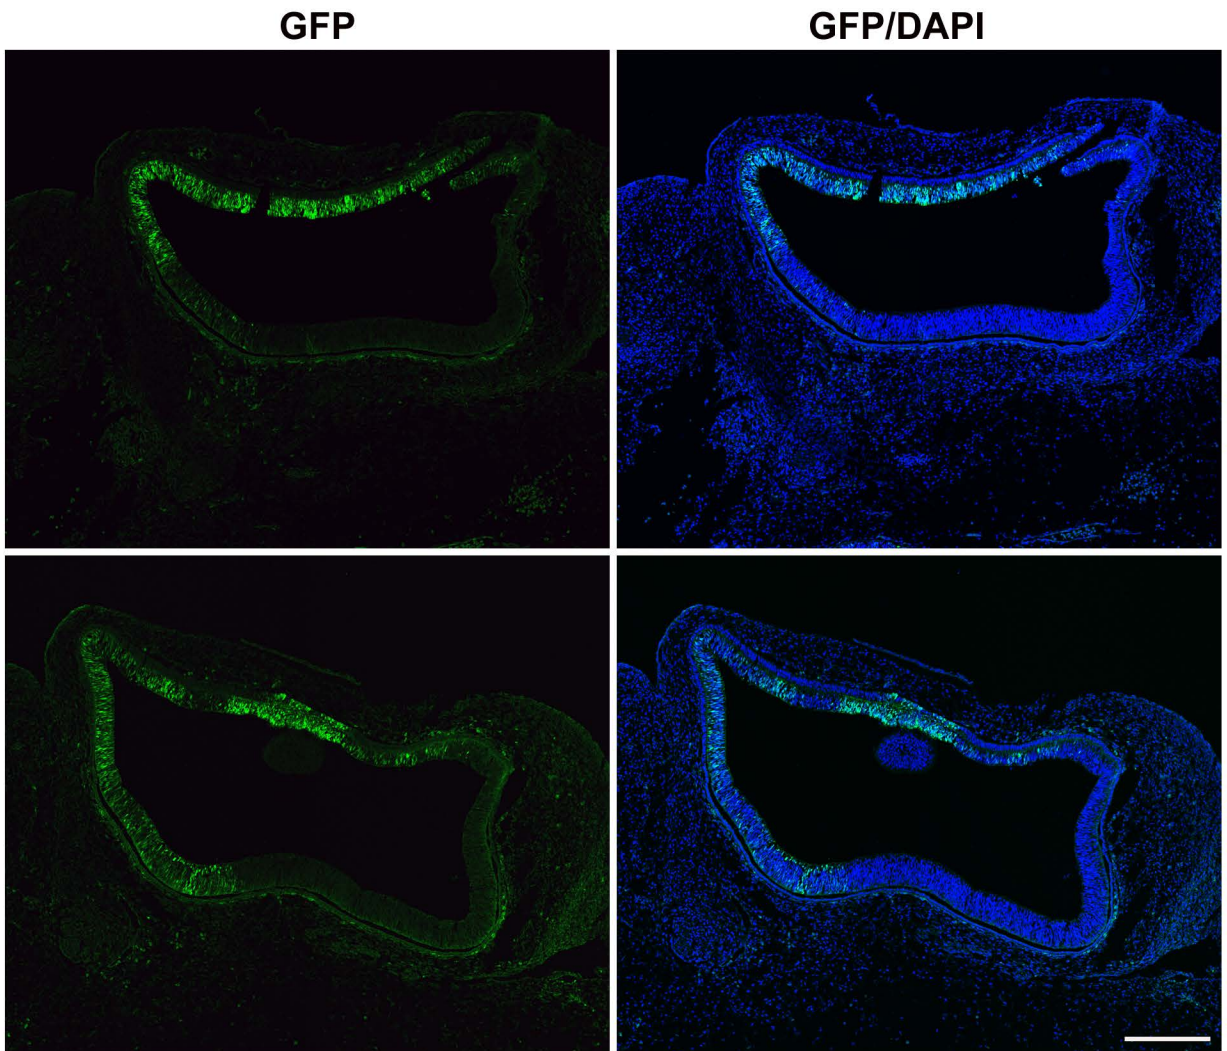

**Fig. S4** Ocular phenotype observed in GFP-AP-2 $\delta$ -injected embryos is caused by AP-2 $\delta$  mis-expression within the retina. Retina tissue sections from E5 embryos *in ovo* electroporated with a GFP-AP2 $\delta$  RCAS expression construct were immunostained with anti-GFP antibody, followed by secondary antibody conjugated to Alexa 488. Nuclei were labeled with DAPI. Photographs were taken with a Zeiss LSM710 confocal microscope equipped with a 10X lens. Scale bar = 500  $\mu$ m.
