# Supplementary material
Source: PubMed Central journal article supplement (PMC4459862)
Supplement: NIHMS4661-supplement-Supplementary_Figure_5.pdf [file NIHMS4661-supplement-Supplementary_Figure_5.pdf]

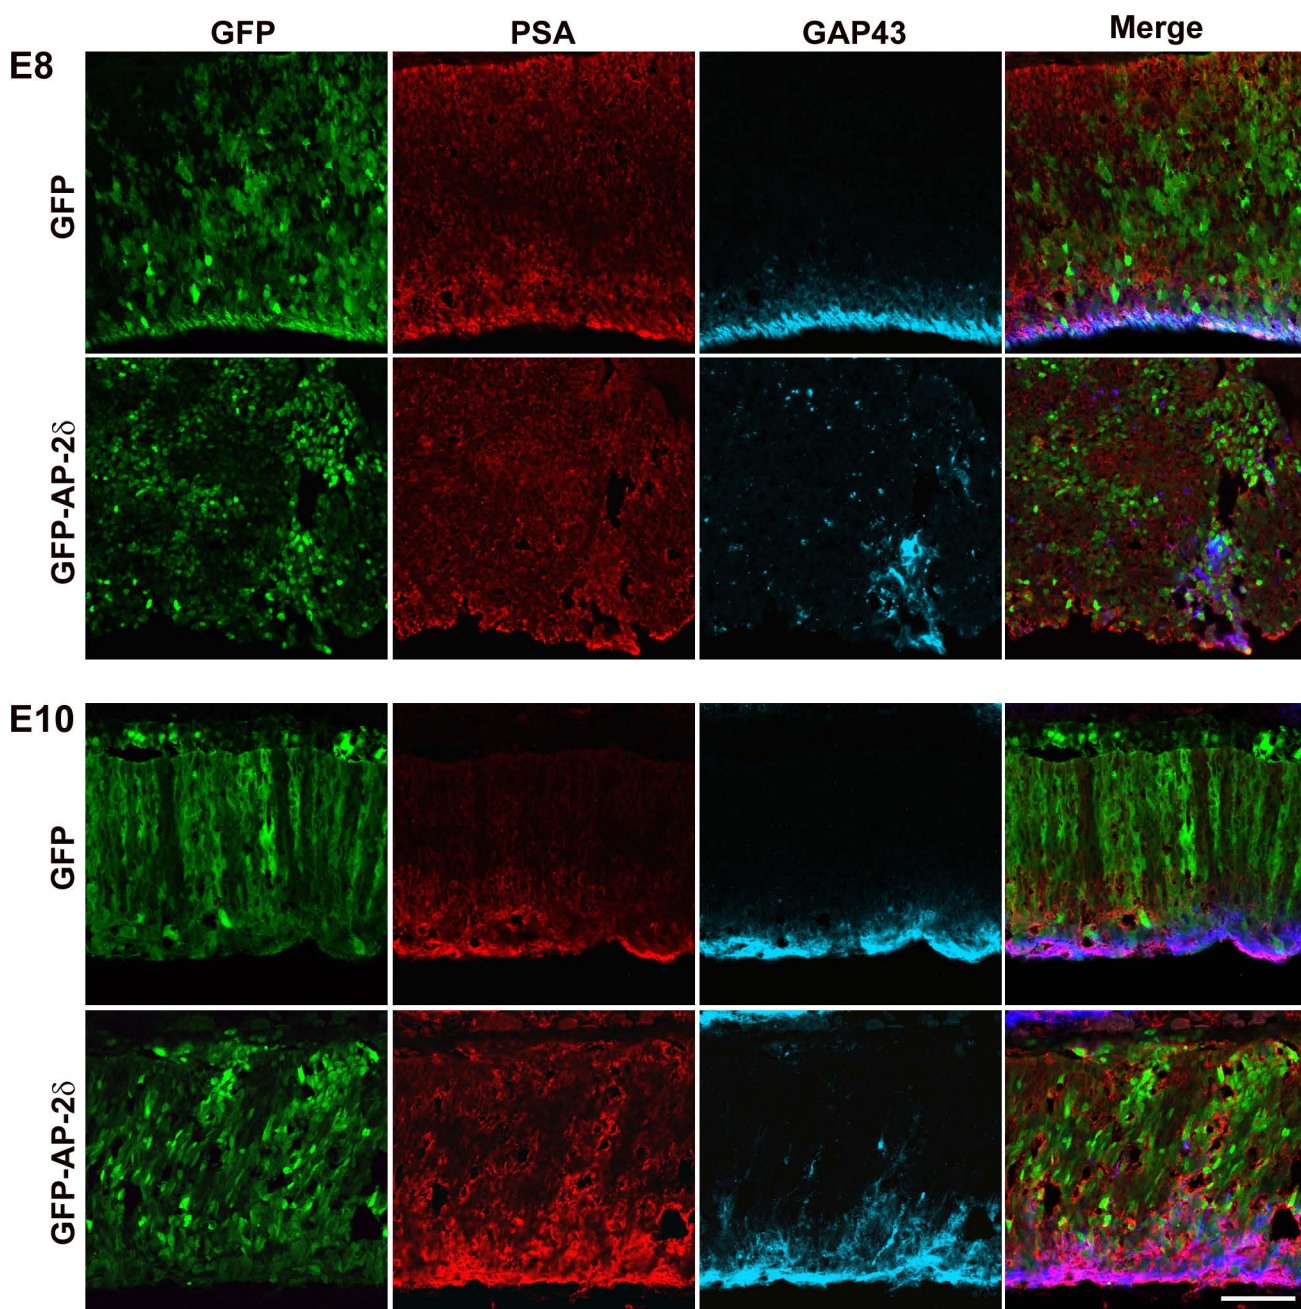

**Figure S5. Localization of PSA-NCAM and GAP43 in GFP-AP-2 $\delta$ -positive regions of the retina.** Retinal tissue sections from E8 and E10 embryos *in ovo* electroporated with GFP- and GFP-AP-2 $\delta$  RCAS expression constructs were immunostained with anti-GFP, anti-PSA-NCAM and anti-GAP43 antibodies followed by secondary antibodies conjugated with Alexa 488, Alexa 555 and Alexa 647, respectively. Photographs were taken with a Zeiss LSM710 confocal microscope equipped with a 40X lens. Scale bar = 50  $\mu$ m.
